# Supplementary material for: A high precision MUA-spaced single-cell sensor for cellular receptor assay based on bifunctional Au@Cu-PbCQD nanoprobes
Source: Royal Society of Chemistry journal article supplement (doi:10.1039/c8nr03847c), 2018-01-01
Supplement: c8nr03847c1.pdf [file c8nr03847c1.pdf]

## Electronic supplementary information

### A high precision MUA-spaced single-cell sensor for cellular receptor assay based on bifunctional Au@Cu-PbCQDs nanoprob

Dongping Long<sup>#</sup>, Chengchi Chen<sup>#</sup>, Chenyu Cui, Zheng Yao and Peihui Yang<sup>\*</sup>

*Department of Chemistry, Jinan University, Guangzhou 510632, China.*

*E-mail: typh@jnu.edu.cn; Tel/Fax: +86-20-85223039*

#### S1.1 UV-vis spectra of Au@Cu-PbCQDs nanoprob

The fabrication of Au@Cu-PbCQDs nanoprob was demonstrated by UV-vis absorbance spectra. As shown in Fig. S1, compared with the spectrum of AuNPs (Fig. S1A), the L-cysteine-modified AuNPs exhibited a new absorption band at 700 nm, which was attributed to L-cysteine modification. The absorption peak of Au@Cu nanoparticles was redshifted correspondingly, because Cu<sup>2+</sup> was connected to the L-cysteine-modified AuNPs. Moreover, compared with the CQDs, the PbCQDs exhibited a large absorption at 280 nm, which was due to the  $\pi$ - $\pi^*$  transition of the C=C bonds. The Au@Cu-PbCQDs nanoprob (Fig. S1B) had Au@Cu nanoparticles and PbCQDs the absorption bands, indicating that the Au@Cu-PbCQDs nanoprob was successfully fabricated.

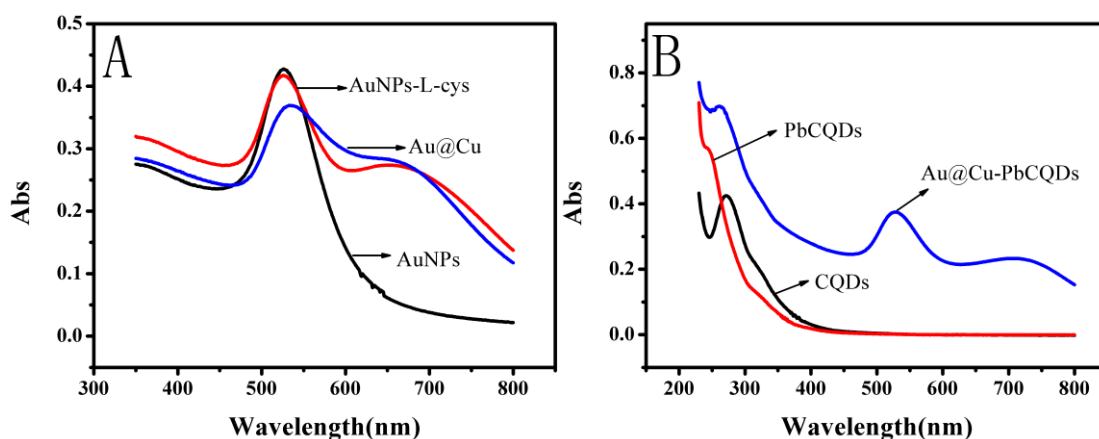

Fig. S1 UV-vis spectra of (A) Au@Cu; (B) Au@Cu-PbCQDs nanoprob.

#### S1.2 Characterization of single-cell capturing

When carrying out the single-cell assay, the single cell was captured on the interface under the inverted microscopy using a pipet by dilution of cell concentration. Fig S2 showed the process of 3 single cells being captured one by one.

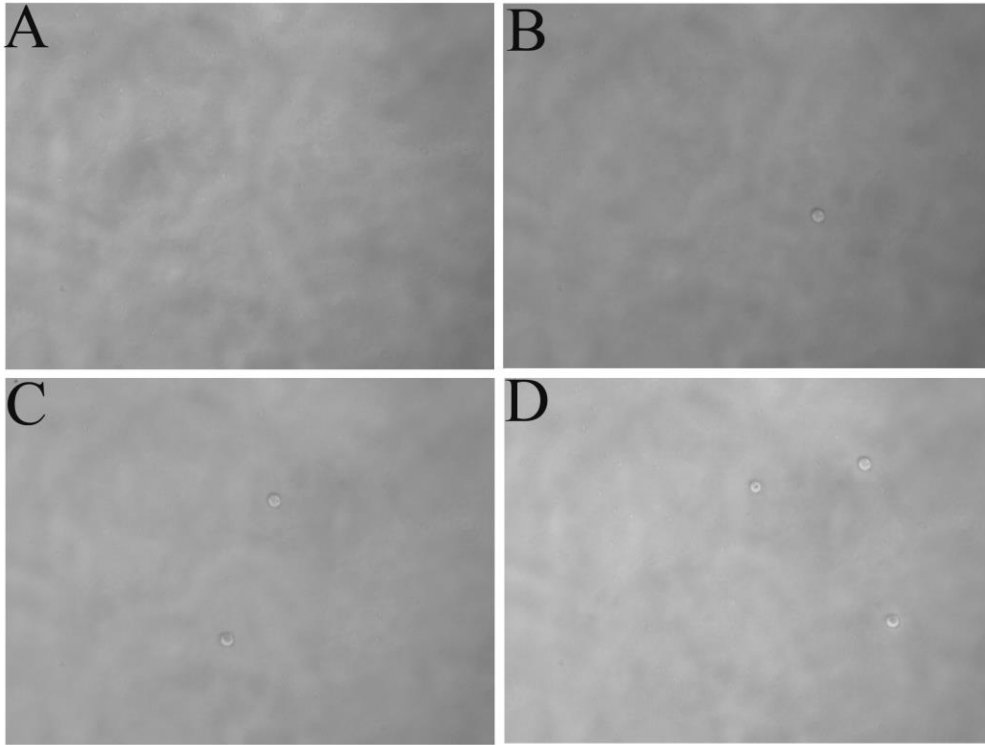

Fig. S2 Inverted microscope images of (A) control, (B) single-cell, (C) 2 cells and (D) 3 cells captured on the interface one by one.

### S1.3. Optimization of the concentration of MA-C<sub>11</sub>

The concentration of MA-C<sub>11</sub> had an important effect on improving the detection sensitivity of single cell in Fig. S3. As the concentration of MA-C<sub>11</sub> progressively increased, the ECL signal increased after 0.6  $\mu\text{mol/L}$  and then tended to level off, indicated that the optimum of the concentration of MA-C<sub>11</sub> was 0.6  $\mu\text{mol/L}$ . These optimal experiment parameters were used in subsequent measurements.

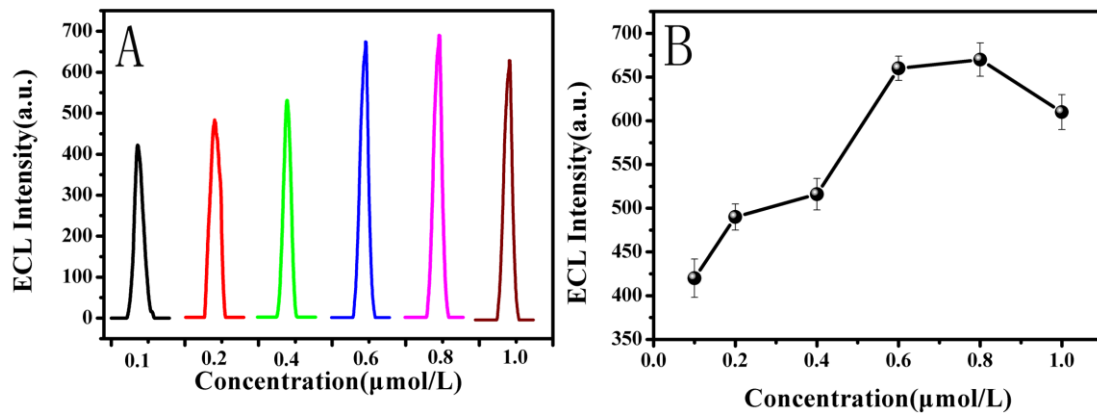

Fig. S3 ECL intensity of MA-C<sub>11</sub> with different concentration (A) and relationship curves of MA-C<sub>11</sub> with different concentration (B).

#### S1.4. Effect of MA-C<sub>n</sub> on electronic-transfer rate

As shown in Table S1, the electron-transfer rate decreased as the carbon number in MA-C<sub>n</sub> increased because the nonconductive MA with long carbon chain could hinder electron transfer while providing interspace on the electrode surface. The electron-transfer rate test indicated that MA-C<sub>n</sub> could to some extent hinder the electron transfer of the sensing interface, which explained why MA-C<sub>16</sub>-spaced sensor showed inferior performance to the MA-C<sub>11</sub> counterpart.

Table S1. Effect of MA-C<sub>n</sub> on electronic-transfer rate

| group                     | $\alpha$ | k / s <sup>-1</sup> |
|---------------------------|----------|---------------------|
| FA(MA-C <sub>0</sub> )    | 0.723    | 0.268               |
| MAA(MA-C <sub>2</sub> )   | 0.472    | 0.171               |
| MSA(MA-C <sub>4</sub> )   | 0.615    | 0.127               |
| MHA(MA-C <sub>6</sub> )   | 0.672    | 0.051               |
| MUA(MA-C <sub>11</sub> )  | 0.501    | 0.023               |
| MHDA(MA-C <sub>16</sub> ) | 0.248    | 0.017               |

#### S1.5. Analytical performance of MUA-spaced single-cell sensor for CD44 receptor

As shown in Fig. S4, the average ECL intensity without MA-C<sub>11</sub> was calculated to be  $387.3 \pm 59.2$  a.u. ( $\bar{x} \pm s$ , n = 20) with an RSD of 15.3%. And the average ECL intensity with MA-C<sub>11</sub> was calculated to be  $619.2 \pm 61.6$  a.u. ( $\bar{x} \pm s$ , n = 20) with an RSD of 9.9%. The average current intensity was  $2.48 \pm 0.19$   $\mu\text{A}$  ( $\bar{x} \pm s$ , n = 10, RSD = 7.7%) and  $4.03 \pm 0.25$   $\mu\text{A}$  ( $\bar{x} \pm s$ , n = 10, RSD = 6.2%) with and without MA-C<sub>11</sub>, respectively. The results implied the heterogeneity of the single cells as well as the improvement of the accuracy for single-cell analysis.

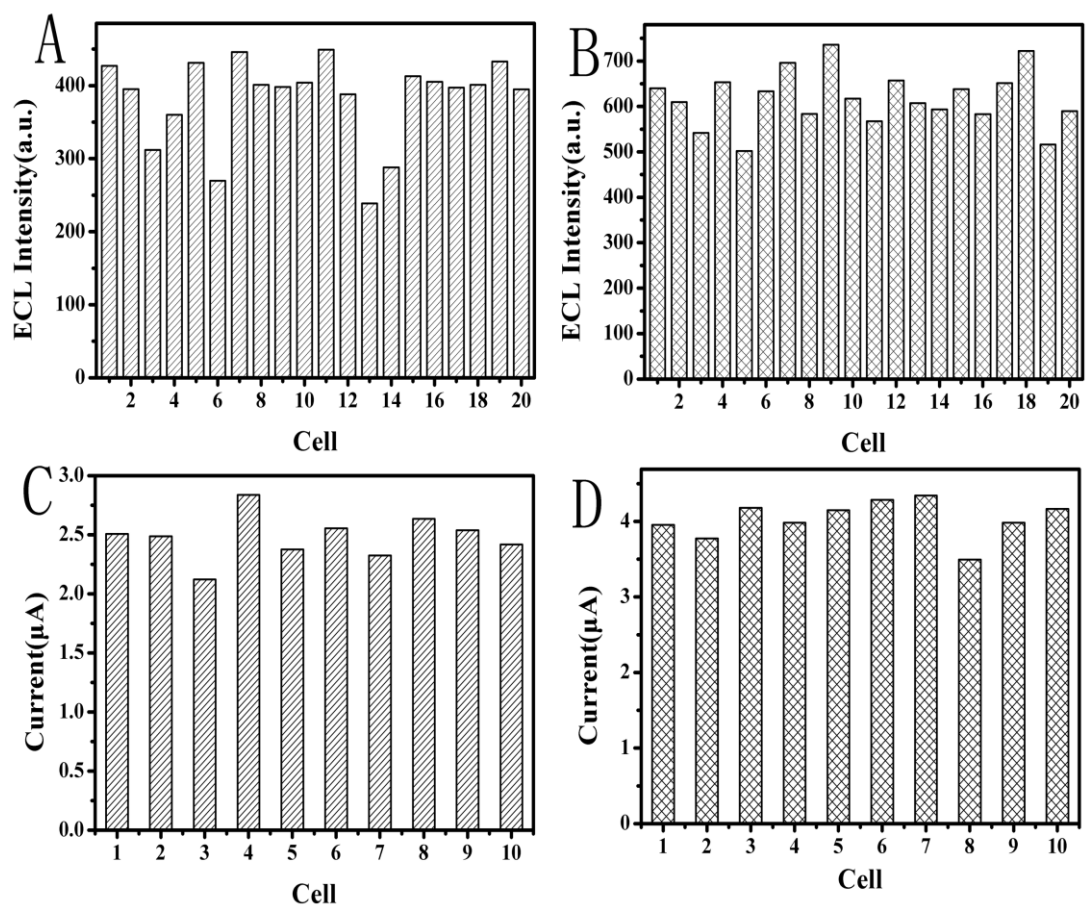

Fig. S4 Histograms of MCF-7 cell capturing without and with MA-C<sub>11</sub>, respectively by ECL analysis (A, B) and DPV analysis (C, D). Each bar represents one cell.
